# Interallelic and Intergenic Incompatibilities of the *Prdm9* (*Hst1*) Gene in Mouse Hybrid Sterility

Petr Flachs<sup>1</sup>, Ondřej Mihola<sup>1</sup>, Petr Šimeček<sup>1</sup>, Soňa Gregorová<sup>1</sup>, John C. Schimenti<sup>2</sup>, Yasuhisa Matsui<sup>3</sup>, Frédéric Baudat<sup>4</sup>, Bernard de Massy<sup>4</sup>, Jaroslav Piálek<sup>5</sup>, Jiří Forejt<sup>1</sup>, Zdenek Trachtulec<sup>1\*</sup>

**1** Department of Mouse Molecular Genetics and Center for Applied Genomics, Institute of Molecular Genetics of the Academy of Sciences of the Czech Republic, Prague, Czech Republic, **2** Center for Vertebrate Genomics, Department of Biomedical Sciences, College of Veterinary Medicine, Cornell University, Ithaca, New York, United States of America, **3** Cell Resource Center for Biomedical Research, Institute of Development, Aging, and Cancer, Tohoku University, Sendai, Japan, **4** Institut de Génétique Humaine, CNRS UPR 1142, Montpellier, France, **5** Institute of Vertebrate Biology, Academy of Sciences CR, Brno and Studenec, Czech Republic

## Abstract

The Dobzhansky-Muller model of incompatibilities explains reproductive isolation between species by incorrect epistatic interactions. Although the mechanisms of speciation are of great interest, no incompatibility has been characterized at the gene level in mammals. The *Hybrid sterility 1* gene (*Hst1*) participates in the arrest of meiosis in F<sub>1</sub> males of certain strains from two *Mus musculus* subspecies, e.g., PWD from *M. m. musculus* and C57BL/6J (henceforth B6) from *M. m. domesticus*. *Hst1* has been identified as a meiotic PR-domain gene (*Prdm9*) encoding histone 3 methyltransferase in the male offspring of PWD females and B6 males, (PWD×B6)F<sub>1</sub>. To characterize the incompatibilities underlying hybrid sterility, we phenotyped reproductive and meiotic markers in males with altered copy numbers of *Prdm9*. A partial rescue of fertility was observed upon removal of the B6 allele of *Prdm9* from the azoospermic (PWD×B6)F<sub>1</sub> hybrids, whereas removing one of the two *Prdm9* copies in PWD or B6 background had no effect on male reproduction. Incompatibility(ies) not involving *Prdm9*<sup>B6</sup> also acts in the (PWD×B6)F<sub>1</sub> hybrids, since the correction of hybrid sterility by *Prdm9*<sup>B6</sup> deletion was not complete. Additions and subtractions of *Prdm9* copies, as well as allelic replacements, improved meiotic progression and fecundity also in the progeny-producing reciprocal (B6×PWD)F<sub>1</sub> males. Moreover, an increased dosage of *Prdm9* and reciprocal cross enhanced fertility of other sperm-carrying male hybrids, (PWD×B6-C3H.*Prdm9*)F<sub>1</sub>, harboring another *Prdm9* allele of *M. m. domesticus* origin. The levels of *Prdm9* mRNA isoforms were similar in the prepubertal testes of all types of F<sub>1</sub> hybrids of PWD with B6 and B6-C3H.*Prdm9* despite their different prospective fertility, but decreased to 53% after removal of *Prdm9*<sup>B6</sup>. Therefore, the *Prdm9*<sup>B6</sup> allele probably takes part in posttranscriptional dominant-negative hybrid interaction(s) absent in the parental strains.

**Citation:** Flachs P, Mihola O, Šimeček P, Gregorová S, Schimenti JC, et al. (2012) Interallelic and Intergenic Incompatibilities of the *Prdm9* (*Hst1*) Gene in Mouse Hybrid Sterility. *PLoS Genet* 8(11): e1003044. doi:10.1371/journal.pgen.1003044

**Editor:** Michael W. Nachman, University of Arizona, United States of America

**Received:** May 17, 2012; **Accepted:** September 7, 2012; **Published:** November 1, 2012

**Copyright:** © 2012 Flachs et al. This is an open-access article distributed under the terms of the Creative Commons Attribution License, which permits unrestricted use, distribution, and reproduction in any medium, provided the original author and source are credited.

**Funding:** The work was supported by grants 1M6837805002 and AV0Z50520514 from the Ministry of Education, Youth, and Sports of the Czech Republic and by grants P305/10/1931, 206/08/0640, and P305/11/P630 from the Czech Science Foundation. FB and BdM were supported by grants from the Centre National de la Recherche Scientifique (CNRS), the Association pour la Recherche sur le Cancer (ARC 3939), and the Agence Nationale de la Recherche (ANR-09-BLAN-0269-01). PF is a Ph.D. student supported in part by the Faculty of Science, Charles University, Prague. The funders had no role in study design, data collection and analysis, decision to publish, or preparation of the manuscript.

**Competing Interests:** The authors have declared that no competing interests exist.

\* E-mail: Zdenek.Trachtulec@img.cas.cz

## Introduction

Hybrid sterility is a condition in which two fertile parental forms produce progeny with disturbed gametogenesis. In mammals and *Drosophila*, it affects spermatogenesis more often than oogenesis [1]. Hybrid sterility acts as a reproductive barrier between species [2]. Although its molecular mechanism is of great interest, only five animal genes involved in hybrid sterility have been cloned and characterized, four of them from *Drosophila* [3–9]. The Dobzhansky-Muller model of incompatibilities of genes [10] explains the reproductive isolation between species by their incorrect epistatic interactions. These interactions (or lack of the correct ones) result in hybrid fitness reduction, probably because the combination of the diverged alleles of the interactors did not pass through natural selection.

The mouse *Hybrid sterility 1* gene (*Hst1*) is one of the major genes causing meiotic arrest in F<sub>1</sub> male hybrids between *Mus m. musculus*

(Mmm) mice harboring the *Hst1*<sup>s</sup> allele (e.g., the PWD strain) and laboratory strains bearing the *Hst1*<sup>S</sup> allele [11]. Strains with the *Hst1*<sup>S</sup> allele include *Mus m. domesticus* (Mmd)-derived C57BL/6J (henceforth B6) and various substrains of the 129 strain. While the male offspring from the crosses of *Hst1*<sup>S</sup> strains with PWD females, e.g., (PWD×B6)F<sub>1</sub>, are azoospermic, the males from the reciprocal crosses using PWD males [(B6×PWD)F<sub>1</sub>] can sire offspring (Figure 1, [6,12]). Other laboratory strains (C3H, the congenic B6.C3H-*Hst1*<sup>f</sup>, etc.) harbor the *Hst1*<sup>f</sup> allele and produce sperm-carrying F<sub>1</sub> males in crosses with PWD females [13]. The male offspring of B6 with C3H, as well as F<sub>1</sub> females in all PWD, B6, and C3H crosses are fertile.

The *Hst1* gene is the first mammalian candidate for a speciation gene. *Hst1* was identified by consecutive mapping of the *Hst1* alleles [14–16], expression profiling [17], allelic sequencing [18,19], and transgenic rescue [6]. The best candidate was confirmed by comparing the phenotypes of its null allele with the

## Author Summary

Disturbed gametogenesis in the progeny of two fertile parental forms is called hybrid sterility; it is an important part of reproductive barriers between species. The Dobzhansky-Muller model of incompatibilities explains reproductive isolation between species by incorrect interactions between genes. *Hybrid sterility 1 (Hst1)* is one of the genes causing meiotic arrest in F<sub>1</sub> male hybrids between certain *Mus musculus musculus* (e.g., the PWD strain) and *M. m. domesticus* (C57BL/6J etc.) mice. *Hst1*, the first mammalian candidate for a speciation gene, was identified as a meiotic PR/SET-domain gene, *Prdm9*, but the mechanism causing sterility has remained unknown. While the F<sub>1</sub> male offspring of C57BL/6J males and PWD females produce no sperm, the males from the reciprocal cross using PWD males and C57BL/6J females yield progeny. Here we show that the meiotic progress and fertility of hybrid males from both F<sub>1</sub> crosses improved by removal as well as overexpression of the C57BL/6J allele of *Prdm9*, suggesting that *Prdm9* interactions not present in the parental species (incompatibilities) play a role in hybrid sterility. Furthermore, the *Prdm9* dosage also controlled fecundity in other F<sub>1</sub> hybrids, indicating that this gene is an important regulator of mouse hybrid fertility.

phenotypes of the sterile hybrids [6]. *Hst1* is also called *Prdm9* (PR-domain containing 9) or *Meisetz* (Meiotic gene with SET/PR domain and  $\zeta$ inc fingers). The product of this gene trimethylates histone 3 on lysine 4 (H3K4m3; [20]). Spermatocytes of *Prdm9*<sup>-/-</sup> animals and sterile hybrids arrest at the pachytene stage of meiotic prophase I, displaying defects in chromosomal pairing and sex body formation, as well as downregulation of meiotic genes. The downregulation correlates with a lower level of H3K4m3 at promoters, at least in the case of the *Morc2b* gene (*4932411A10Rik*; [6,20]). The *Morc2b* mRNA is elevated in (PWD×B6-C3H.*Hst1*<sup>f</sup>)F<sub>1</sub> compared to (PWD×B6)F<sub>1</sub> prepubertal testis, while the levels of all known *Prdm9* transcripts are similar [6].

The chromatin of mouse meiotic recombination hotspots is marked by H3K4m3 at the start of meiosis [21]. Genetic mapping of a gene acting in *trans* to influence the activity of recombination hotspots also led to the identification of *Prdm9* [22,23]. PRDM9 binds DNA at recombination hotspots via its zinc-fingers (ZnFs) *in vitro*, and genetic manipulation of ZnFs changes the localization of the hotspots [22,24].

The *Prdm9* genes from C3H and B6 strains (alleles *Hst1*<sup>f</sup> and *Hst1*<sup>s</sup>, respectively), display many polymorphisms [6]. The difference that may underlie hybrid sterility is the number of C-terminal ZnFs [6]. The number of ZnFs corresponds to *Hst1* alleles in other classical Mmd laboratory strains [19,25]. The ZnF-encoding region of the PWD allele differs from both C3H and B6 [6], but whether *Prdm9*<sup>PWD</sup> is identical to *Hst1*<sup>s</sup> and whether it contributes to hybrid sterility is not known. Although accelerated evolution of the minisatellite-like ZnF-encoding region of PRDM9 was manifested in human and animals [26], it remains to be shown whether PRDM9 has a more general role in speciation.

The *Prdm9*<sup>B6</sup> allele is necessary but not sufficient for hybrid sterility. The *Hst1* gene from Mmm is also located on chr17 [12]. In the sterile (PWD×B6)F<sub>1</sub> males, chr17 carries the combination *Hst1*<sup>s</sup>/*Prdm9*<sup>B6</sup>, but the same genotype in the B6 background of (B6.PWD-Chr17×B6)F<sub>1</sub> yields fertile males (Figure 1; [27]). It was shown recently that *Hst1*<sup>s</sup>/*Prdm9*<sup>B6</sup> is the only combination resulting in a complete meiotic arrest in (PWD×B6)F<sub>1</sub> hybrid males, because both *Prdm9*<sup>B6</sup>/*Prdm9*<sup>B6</sup> and *Hst1*<sup>s</sup>/*Hst1*<sup>s</sup> homozygotes on the same

background were fertile [12]. However, even on the F<sub>1</sub> background, the *Hst1*<sup>s</sup>/*Prdm9*<sup>B6</sup> combination does not always lead to azoospermic males, as the reciprocal (B6×PWD)F<sub>1</sub> males carry sperm. Thus, mouse hybrid sterility reflects incompatibilities among multiple hybrid sterility loci, one of them being the *Prdm9* gene [12].

Here we manipulated the dosage and allelic combinations of *Prdm9* in an attempt to characterize the role of this mouse hybrid sterility gene in the incompatibilities. If *Prdm9*<sup>B6</sup> has a dominant-negative effect(s), its deletion should alleviate the meiotic arrest and rescue the fertility of hybrids. Moreover, a *Prdm9*-overexpressing transgene might dilute the *Prdm9*<sup>B6</sup> incompatibility(ies), which should rescue fertility regardless of the *Prdm9* allelic origin. We show that the fertility of all F<sub>1</sub> intersubspecific hybrids tested is proportional to the dosage of *Prdm9* regardless of its allele; the only exception is the combination of one *Prdm9*<sup>B6</sup> allele with one *Prdm9*<sup>PWD</sup> allele in either type of reciprocal hybrid that results into a more sterile phenotype than the corresponding hybrid harboring only one *Prdm9*<sup>PWD</sup> allele. This exception indicates an F<sub>1</sub> hybrid-specific dominant-negative interaction(s) of *Prdm9*<sup>B6</sup>.

## Results

### Dosage-dependent, allele-independent rescue of fertility in the (PWD×B6)F<sub>1</sub> hybrid

The fertility of azoospermic intersubspecific (PWD×B6)F<sub>1</sub> hybrid males is rescued by *Prdm9*<sup>C3H</sup>-carrying BACs [6]. Moreover, six copies of the *Prdm9*<sup>C3H</sup> allele in a transgene (BAC24) increased reproductive fitness compared to two copies of the same allele (BAC5 transgene) in *Prdm9*<sup>PWD/B6</sup> (PWD×B6)F<sub>1</sub> intersubspecific hybrid males ([6] and Table 1), although no effect of increased *Prdm9* dosage appeared on the intrasubspecific background (a mix of 129 and B6 genomes, henceforth B6 \* 129 [6]). There are three possible explanations for the fertility rescue by the *Prdm9*<sup>C3H</sup> BACs: first, by allelic replacement; second, by increased dosage regardless of allelic origin; third, both. To distinguish among these hypotheses, a transgene harboring the *Prdm9*<sup>B6</sup> allele was utilized. The C57BL/6J-Tg(RP23-159N6)75Bdm strain carries two *Prdm9*-expressing copies of a B6 BAC transgene on B6 background [24]. In this background, the transgene has no effect on fertility (Table S1). After outcrossing the heterozygous transgenic males to PWD, non-transgenic F<sub>1</sub> hybrid males were azoospermic (as expected), while their transgenic littermates had an increased testicular weight (TW) and carried sperm (Table 1). The increased copy number of the *Prdm9*<sup>B6</sup> allele also rescued fertility of azoospermic hybrids produced by another Mmm strain, STUS (Table S1). Thus the improvement of fertility by increased *Prdm9* dosage is not restricted to the C3H allele.

To further investigate the effect of *Prdm9* dosage on hybrid sterility, we used two null alleles of *Prdm9*, a large deletion of proximal chr17 (*Sod2*<sup>fl14J</sup> [28]) and a knock-out of *Prdm9* that removes the first five coding exons (*Prdm9*<sup>tm11mat</sup> [20]). Males hemizygous for these alleles on (129 \* B6) as well as on B6 background display similar fertility parameters as their littermates ([20,29], and Table S2). To determine the effect of the null alleles on intersubspecific F<sub>1</sub> hybrids, the hemizygous males were outcrossed to PWD. Unlike their azoospermic *Prdm9*<sup>PWD/B6</sup> F<sub>1</sub> littermates, most of the *Prdm9*<sup>PWD/-</sup> intersubspecific hybrids were semisterile with TW, sperm count (SC), and offspring production (offspring per female per month, OFM) significantly higher than in the (PWD×B6)F<sub>1</sub> littermates (Table 1 and Table S3). All *Prdm9*<sup>PWD/-</sup> hybrid males resulting from the cross of PWD females with *Prdm9*<sup>B6/-</sup> on B6 background carried a low but detectable amount of sperm and most of them produced offspring (0.3±0.2 OFM). As an additional control, we introduced the

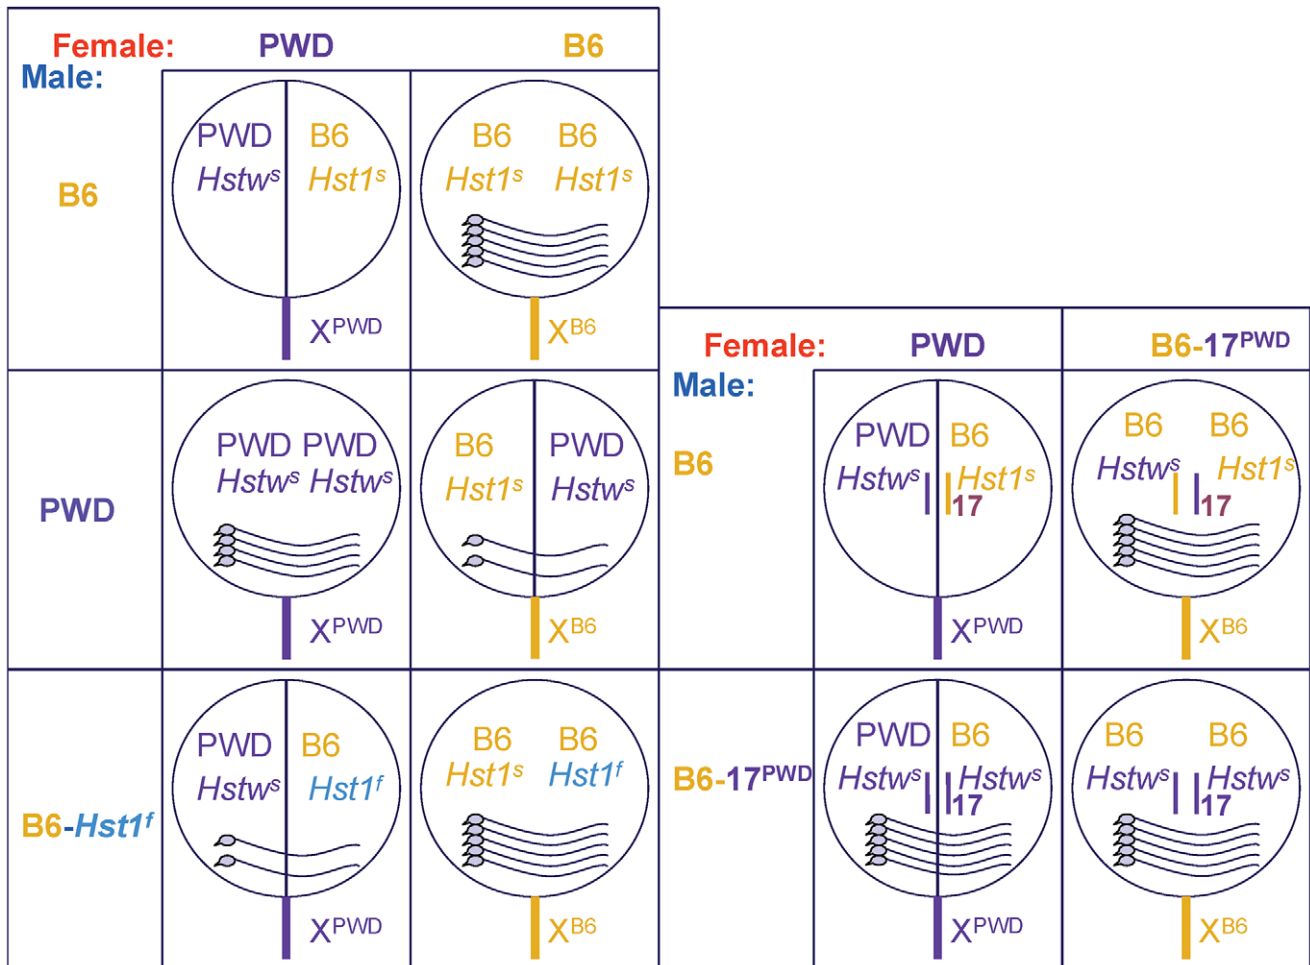

**Figure 1. Fertility of male offspring resulting from various crosses.** The female parents are shown from left to right and male parents from top to bottom. The circles symbolize genomes (chrX sticking out), intersubspecific hybrids have the circles split in halves; the pictures of sperm cells within the circles indicate the degree of fertility. Except for the (PWD×B6)<sub>F1</sub> hybrids, all males carry sperm; female offspring from all indicated crosses are fertile. doi:10.1371/journal.pgen.1003044.g001

*Prdm9<sup>tm1Ymat</sup>* null allele into the PWD background. Here, one copy of *Prdm9<sup>PWD</sup>* was sufficient to maintain the fertility parameters of the *Prdm9<sup>PWD/PWD</sup>* littermates (Table S2). Therefore, the (PWD×B6)<sub>F1</sub> hybrid genetic background appears to be more sensitive to low *Prdm9* dosage than that of either parent. Both addition and removal of *Prdm9<sup>B6</sup>* improves the phenotype of (PWD×B6)<sub>F1</sub> males. The fertility rescue of azoospermic hybrid males by the *Prdm9* null alleles, albeit partial, suggests that an aberrant interaction(s) of *Prdm9<sup>B6</sup>* occurs in (PWD×B6)<sub>F1</sub> hybrids that is not present in the parental strains.

#### Incompatibility of *Prdm9<sup>B6</sup>* in (PWD×B6)<sub>F1</sub> males

The *Prdm9<sup>C3H</sup>* allele rescues the fertility phenotype of the (PWD×B6)<sub>F1</sub> hybrid in a dosage-dependent manner. To compare the effect of a single C3H allele and a null allele on hybrid males resulting from a cross segregating these alleles, we utilized the congenic strain B6-*Prdm9<sup>C3H</sup>*. After outcrossing animals hemizygous for *Prdm9* to this congenic and then crossing the preselected *Prdm9<sup>C3H/-</sup>* males to PWD females, the resulting *Prdm9<sup>PWD/-</sup>* hybrids had a significantly lower TW and SC than their *Prdm9<sup>PWD/C3H</sup>* littermates (Table 1). The *Prdm9<sup>PWD/-</sup>* hybrids produced markedly less progeny ( $0.3 \pm 0.2$  OFM) in comparison with the *Prdm9<sup>PWD/C3H</sup>* hybrids ( $3.6 \pm 0.5$  OFM, Table S4). Thus the intersubspecific F<sub>1</sub> hybrid males carrying *Prdm9<sup>PWD/-</sup>*

were not just more fertile than *Prdm9<sup>PWD/B6</sup>*, but they were also less fertile than *Prdm9<sup>PWD/C3H</sup>*.

To analyze the sensitivity of *Prdm9<sup>PWD/-</sup>* F<sub>1</sub> background, the dosage of *Prdm9<sup>C3H</sup>* was increased by utilizing the BAC5 (two copies of *Prdm9<sup>C3H</sup>*) or the BAC24 (six copies of *Prdm9<sup>C3H</sup>*) transgenes. Again, the fertility parameters of the F<sub>1</sub> transgenic hybrids improved with *Prdm9<sup>C3H</sup>* dosage (Table 1;  $p_{SC} = 0.006$ ,  $p_{TW} = 0.008$ , but no significant difference in relative testes weight: 6.6 versus 7.3,  $p = 0.33$ ). The *Prdm9* dosage effect is therefore observed in both *Prdm9<sup>PWD/B6</sup>* and *Prdm9<sup>PWD/-</sup>* F<sub>1</sub> hybrids. In conclusion, the B6 allele displays different properties than the C3H allele when present in one copy in the *Prdm9<sup>PWD/B6</sup>* F<sub>1</sub> hybrid male, because it decreases the fertility compared to *Prdm9<sup>PWD/-</sup>* F<sub>1</sub> hybrid. This could be the result of a dominant-negative interaction of *Prdm9<sup>B6</sup>* with specific loci in (PWD×B6)<sub>F1</sub> and/or with the *Prdm9<sup>PWD</sup>* allele.

#### The semisterility of *Prdm9<sup>PWD/-</sup>* maintains characteristics of hybrid sterility

Hybrid sterility is most often sex-specific [1] and dependent on the origin of parents. The (PWD×B6)<sub>F1</sub> hybrid displays a complete male-specific arrest of gametogenesis that is at least partially alleviated in reciprocal (B6×PWD)<sub>F1</sub> and in 94% of

**Table 1.** The effect of *Prdm9* dosage on hybrid sterility.

| Cross (female first)                      | <i>Prdm9</i> | n  | TW   | SC                |
|-------------------------------------------|--------------|----|------|-------------------|
| PWD×B6-BACB6                              | PWD/B6       | 9  | 55   | 0.00 <sup>a</sup> |
| PWD×B6-BACB6                              | PWD/B6+2B6   | 3  | 167* | 18* <sup>a</sup>  |
| PWD×B6-KO                                 | PWD/B6       | 10 | 59   | 0.00              |
| PWD×B6-KO                                 | PWD/–        | 12 | 82*  | 0.06*             |
| PWD×(B6- <i>Prdm9</i> <sup>C3H</sup> ×KO) | PWD/–        | 10 | 94   | 0.10              |
| PWD×(B6- <i>Prdm9</i> <sup>C3H</sup> ×KO) | PWD/C3H      | 8  | 140* | 1.06*             |
| PWD×B6- <i>Prdm9</i> <sup>C3H</sup>       | PWD/C3H      | 8  | 109  | 0.2               |
| PWD×(KO×BAC5)                             | PWD/–        | 13 | 85   | 0.07              |
| PWD×(KO×BAC5)                             | PWD/–+2C3H   | 15 | 168* | 1.6*              |
| PWD×(KO×BAC24)                            | PWD/–        | 9  | 77   | 0.03              |
| PWD×(KO×BAC24)                            | PWD/–+6C3H   | 5  | 235* | 3.9*              |

B6-BACB6, C57BL/6J-Tg(RP23-159N6)75Bdm mouse heterozygous for a *Prdm9*<sup>B6</sup> transgene; BAC5, transgenic strain with two copies of *Prdm9*<sup>C3H</sup>; BAC24, strain carrying six transgenic copies of *Prdm9*<sup>C3H</sup>; KO, B6-KO, heterozygote for the *Prdm9* knock-out; *Prdm9*, genotype at the *Prdm9* locus (maternal/paternal); –, null; +, transgenic *Prdm9* alleles; n, number of males; TW, mean weight of paired testicles in mg; SC, average sperm count (millions) in paired caput epididymides or  
<sup>a</sup>in the left epididymis by a different method;  
 \*significantly higher (p<0.01) compared to littermates (in the row above).  
 doi:10.1371/journal.pgen.1003044.t001

males from the backcross ((PWD×B6)×B6) [12]. To determine whether the semisterility of the *Prdm9*<sup>PWD/–</sup> intersubspecific males displays the same features, additional phenotyping was performed. All four tested *Prdm9*<sup>PWD/–</sup> females produced offspring, in a number (4.8±0.8 OFM) similar to their *Prdm9*<sup>PWD/B6</sup> littermates (4.5±0.2) and (PWD×B6-*Prdm9*<sup>C3H</sup>)<sub>F1</sub> females (5.5±0.6). The semisterility of *Prdm9*<sup>PWD/–</sup> F<sub>1</sub> hybrids is thus male-specific. When the *Prdm9*<sup>PWD/–</sup> F<sub>1</sub> females were backcrossed to PWD, the resulting BC<sub>1</sub> *Prdm9*<sup>PWD/–</sup> hemizygous males displayed a four-fold increase of average SC compared to *Prdm9*<sup>PWD/–</sup> F<sub>1</sub> hybrid males (p=0.013), indicating that the compromised fertility is most pronounced in the F<sub>1</sub> generation. The TW and SC of the reciprocal (B6-*Prdm9*<sup>–/wt</sup>×PWD)<sub>F1</sub> *Prdm9*<sup>–/PWD</sup> males (Table 2) was markedly higher than that of the (PWD×B6-*Prdm9*<sup>–/wt</sup>)<sub>F1</sub> *Prdm9*<sup>PWD/–</sup> hybrids (Table 1), displaying an asymmetry similar to the F<sub>1</sub> cross of B6 and PWD. Thus, the fertility of *Prdm9*<sup>PWD/–</sup> hybrid likely suffers from an incompatibility(ies), but to a lesser degree than in the presence of *Prdm9*<sup>B6</sup>.

***Prdm9* dosage and alleles affect spermatogenesis of reciprocal (B6×PWD)<sub>F1</sub> hybrids**

Previously, the fertility of the azoospermic (PWD×B6)<sub>F1</sub> males resulting from the cross of PWD females with B6 males was rescued by *Prdm9*<sup>C3H</sup> overexpression [6], but *Prdm9* dosage has not been studied in the reciprocal, sperm-carrying (B6×PWD)<sub>F1</sub> hybrids, although these males do not reach the reproductive fitness of fully fertile males (Table 2 and Table 3). To analyze the *Prdm9* dosage effect in the reciprocal hybrids, we crossed PWD males with females carrying a variable number of four different *Prdm9* alleles on B6 background. The fertility parameters of the *Prdm9*<sup>–/PWD</sup> hybrid males were superior to those of their (B6×PWD)<sub>F1</sub> *Prdm9*<sup>B6/PWD</sup> littermates (Table 2). The parameters of the *Prdm9*<sup>B6/PWD</sup> transgenics carrying BAC5 were also better than those of the *Prdm9*<sup>B6/PWD</sup> control (Table 2). In contrast, BAC21 overlapping most of BAC5 but carrying truncated *Prdm9* [6] did not improve the fertility of *Prdm9*<sup>B6/PWD</sup> hybrids (Table S5). To discern whether a single copy of *Prdm9*<sup>C3H</sup> can improve the fertility of

**Table 2.** Effects of *Prdm9* alleles and dosage on reciprocal hybrids.

| Cross (female first)                      | <i>Prdm9</i>         | n  | BW | TW               | SC   |
|-------------------------------------------|----------------------|----|----|------------------|------|
| B6-KO×PWD                                 | B6/PWD               | 15 | 25 | 105              | 0.5  |
| B6-KO×PWD                                 | –/PWD                | 11 | 27 | 174*             | 4.1* |
| (B6×B6- <i>Prdm9</i> <sup>C3H</sup> )×PWD | B6/PWD               | 7  | 24 | 97               | 0.3  |
| (B6×B6- <i>Prdm9</i> <sup>C3H</sup> )×PWD | C3H/PWD              | 5  | 25 | 171*             | 2.2* |
| BAC5/BAC5×PWD                             | B6+2C3H/PWD          | 7  | 25 | 181*             | 3.1* |
| B6.PWD-Chr17×PWD                          | PWD/PWD <sup>a</sup> | 7  | 24 | 220*             | 4.2* |
| B6×B6                                     | B6/B6                | 3  | 28 | 195*             | 3.2* |
| PWD×PWD                                   | PWD/PWD              | 4  | 20 | 119 <sup>b</sup> | 1.9* |

B6-KO, heterozygote for the *Prdm9* knock-out; B6-BACB6, C57BL/6J-Tg(RP23-159N6)75Bdm male heterozygous for a *Prdm9*<sup>B6</sup> transgene; *Prdm9*, genotype at the *Prdm9* locus (maternal/paternal); –, null; +, transgenic *Prdm9* alleles; n, number of males; BW, body weight (g); TW, mean weight of paired testicles in mg; SC, average sperm count (millions) in paired caput epididymides;  
<sup>a</sup>genotype at the entire chr17 (the rescue can also be due to a different gene, *Hstw*);  
 \*significantly higher than in *Prdm9*<sup>B6/PWD</sup> reciprocal hybrids (rows 1 and/or 3);  
<sup>b</sup>significantly higher relative testis weight (TW per body weight) compared to animals in rows 1 and 3 (p<0.002).  
 doi:10.1371/journal.pgen.1003044.t002

reciprocal hybrids, males from the cross ((B6×B6-*Prdm9*<sup>C3H</sup>)×PWD) were inspected. The increased fecundity of a subset of these males could be ascribed to the presence of *Prdm9*<sup>C3H</sup> (Table 2, p<sub>TW</sub><0.001, p<sub>SC</sub>=0.003). The reciprocal *Prdm9*<sup>C3H/PWD</sup> F<sub>1</sub> males displayed superior fertility parameters than the *Prdm9*<sup>PWD/C3H</sup> hybrids (Table S4; p<sub>TW</sub>=0.004, p<sub>SC</sub>=0.03, p<sub>OFM</sub>=0.04).

To determine whether the fertility rescue of the reciprocal hybrids is limited to the *Prdm9*<sup>C3H</sup> allele and the PWD Mmm strain, we again used the C57BL/6J-Tg(RP23-159N6)75Bdm (carrying *Prdm9*<sup>B6</sup>) and STUS strains. The Mmm-derived strain STUS produces sterile (azoospermic or oligospermic) male offspring with B6 females [30,31]. In agreement with this finding, the non-transgenic F<sub>1</sub> male progeny of STUS males with B6 females heterozygous for the *Prdm9*<sup>B6</sup> BAC were sterile; however, the transgenic littermates were fertile (Table S1). Thus, a single copy of the *Prdm9*<sup>B6</sup> allele caused a decrease in fertility of F<sub>1</sub> hybrids compared to the males having this allele removed, while the increased dosage of the same allele improved fertility in all F<sub>1</sub> intersubspecific hybrid backgrounds tested.

The substitution of chr17<sup>B6</sup> with chr17<sup>PWD</sup> using the B6.PWD-Chr17 strain rescued fertility of (PWD×B6)<sub>F1</sub> azoospermic hybrids, because the (PWD×B6.PWD-Chr17)<sub>F1</sub> males are fertile [12]. To assess the role of chr17 heterozygosity and *Prdm9*<sup>PWD</sup> dosage in the semifertile reciprocal *Prdm9*<sup>B6/PWD</sup> hybrids, (B6.PWD-Chr17×PWD)<sub>F1</sub> males were phenotyped. The replacement of chr17<sup>B6</sup> with chr17<sup>PWD</sup> in (B6×PWD)<sub>F1</sub> hybrids led to full fertility (Table 2, p<sub>TW</sub><0.001, p<sub>SC</sub><0.001).

Thus, the reciprocal hybrids are sensitive to the same combinations of *Prdm9* alleles and dosage as the (PWD×B6)<sub>F1</sub> hybrids, but with a shift towards higher fertility (Table 4 and Table S4). Because one copy of *Prdm9*<sup>B6</sup> reduced fecundity when added to *Prdm9*<sup>–/PWD</sup> F<sub>1</sub> hybrids, the semifertility of the (B6×PWD)<sub>F1</sub> hybrids appears to be affected by a dominant-negative interaction(s) of *Prdm9*<sup>B6</sup>.

**The overall fertility phenotypes correlate with the strength of meiotic arrest**

The *Prdm9*<sup>PWD/B6</sup>, *Prdm9*<sup>PWD/–</sup>, and *Prdm9*<sup>PWD/C3H</sup> F<sub>1</sub> hybrids show a progressive increase in overall fertility, yet even the



**Table 3.** Overview of male reproductive phenotypes.

| <i>Prdm9</i> | —/—   | PWD/B6         | PWD/—          | B6/PWD         | PWD/C3H        | PWD/PWD          | B6/B6 |
|--------------|-------|----------------|----------------|----------------|----------------|------------------|-------|
| Background   | B6    | F <sub>1</sub> | F <sub>1</sub> | F <sub>1</sub> | F <sub>1</sub> | PWD              | B6    |
| Sex body     | 21%   | 31%            | 67%            | 71%            | 88%            | 96%              | 99%   |
| Diplotene    | 0.3%  | 5%             | 16%            | 17%            | 16%            | 18%              | 21%   |
| Spermatids   | <1%   | <2%            | 30%            | 45%            | 45%            | 80%              | 74%   |
| SC           | 0.000 | 0.000          | 0.06           | 0.4            | 0.4            | 1.9              | 3.2   |
| TW           | 54    | 61             | 85             | 105            | 110            | 119 <sup>a</sup> | 195   |
| OFM          | 0.00  | 0.00           | 0.3            | 3.6            | 3.4            | 6.3              | 6     |

*Prdm9*, genotype at *Prdm9* (maternal/paternal); Sex body, % pachytene spermatocytes that form a sex body; Diplotene, % diplotene of all primary spermatocytes; Spermatids, % round spermatids counted from the total of round spermatids and primary spermatocytes; SC, sperm count in paired caputs (millions); TW, testicular weight (mg); OFM, offspring per female per month;

<sup>a</sup>significantly higher relative TW (TW per body weight) than for males in columns 1 through 5. See Table S4 for more details and statistics.

doi:10.1371/journal.pgen.1003044.t003

*Prdm9*<sup>PWD/C3H</sup> F<sub>1</sub> hybrid does not reach the parameters of other fertile males (Table 1). The fecundity defects in these hybrids could either represent different degrees of the same arrest or multiple breakdowns affecting different stages of spermatogenesis. To compare the progress of spermatogenesis in these hybrids, indirect immunofluorescence microscopy was performed on surface-spread nuclei of adult testicular cells (chromosome spreads, Table 3 and Table S4). In agreement with the SC data but in contrast to sterile hybrids carrying *Prdm9*<sup>PWD/B6</sup>, the chromosome spreads revealed the presence of spermatids in (PWD×B6-*Prdm9*<sup>wt/-</sup>)F<sub>1</sub> *Prdm9*<sup>PWD/-</sup> males. The relative number of round spermatids in these *Prdm9*<sup>PWD/-</sup> testes did not reach the number observed in *Prdm9*<sup>PWD/C3H</sup> hybrids (Table 3 and Table S4, p<0.001). Due to an arrest at pachynema, the relative number of the four stages of primary spermatocytes in *Prdm9*<sup>PWD/B6</sup> was different from *Prdm9*<sup>PWD/-</sup> and *Prdm9*<sup>PWD/C3H</sup> F<sub>1</sub> intersubspecific hybrids (Table 3 and Table S4, Figure S1). A sex body was formed in 67% of pachytene spermatocytes of *Prdm9*<sup>PWD/-</sup>

hybrids (Figure 2), a higher proportion in comparison to *Prdm9*<sup>PWD/B6</sup> (p<0.001) but lower compared to *Prdm9*<sup>PWD/C3H</sup> hybrids (p = 0.001). The *Prdm9*<sup>PWD/C3H</sup> hybrid carried a lower ratio of pachytene spermatocytes displaying a sex body than the B6 (p = 0.004) and PWD (p = 0.03) fertile controls. The staining of spermatocyte chromosome spreads with MLH1 and SYCP1 revealed that the proportion of nuclei with fully synapsed pachytene chromosomes carrying over 20 recombination nodules is higher in the *Prdm9*<sup>PWD/-</sup> than in the *Prdm9*<sup>PWD/B6</sup> hybrids (p<0.001). The *Prdm9*<sup>PWD/-</sup> hybrids were similar in this respect to *Prdm9*<sup>PWD/C3H</sup>, but both carried less pachytene spermatocytes with completed recombination than B6 and PWD (Table S4). The meiotic phenotypes thus correlate with the TW-SC-OFM data; the *Prdm9*<sup>PWD/B6</sup>, *Prdm9*<sup>PWD/-</sup>, and *Prdm9*<sup>PWD/C3H</sup> F<sub>1</sub> hybrids display a gradual increase in meiotic progress, yet even the *Prdm9*<sup>PWD/C3H</sup> F<sub>1</sub> hybrid does not reach the parameters of B6 or PWD.

**Table 4.** Males differing by the *Prdm9* allele, its dosage, or background divided into classes according to fertility.

| Class                  | Sterile                     | Semisterile                 | Semifertile                 | Fertile                     | Fertile                     |
|------------------------|-----------------------------|-----------------------------|-----------------------------|-----------------------------|-----------------------------|
| TW (mg)                | 45 to 70                    | 70 to 90                    | 90 to 140                   | above 140                   | above 180                   |
| SC (×10 <sup>6</sup> ) | 0.00                        | 0.01 to 0.2                 | 0.2 to 1.1                  | above 1.1                   | above 3.5                   |
| OFM                    | 0.00                        | 0.1 to 1                    | 3 to 4                      | above 4                     | above 5                     |
| Background:            | <i>Prdm9</i> <sup>±</sup> : | <i>Prdm9</i> <sup>±</sup> : | <i>Prdm9</i> <sup>±</sup> : | <i>Prdm9</i> <sup>±</sup> : | <i>Prdm9</i> <sup>±</sup> : |
| PWD×B6                 | PWD/B6                      | PWD/—                       |                             | PWD/B6+2B6                  | PWD/PWD                     |
| PWD×B6                 |                             |                             | PWD/C3H                     | PWD/—+2C3H                  | PWD/—+6C3H                  |
| PWD×B6                 |                             |                             |                             | PWD/B6+2C3H                 | PWD/B6+6C3H                 |
| B6×PWD                 |                             |                             | B6/PWD                      | —/PWD                       | PWD/PWD                     |
| B6×PWD                 |                             |                             |                             | C3H/PWD                     | B6+2C3H/PWD                 |
| STUS×B6                | STUS/B6                     |                             |                             | STUS/B6+2B6                 |                             |
| B6×STUS                | B6/STUS                     |                             |                             | B6+2B6/STUS                 |                             |
| B6×B6                  | —/—                         |                             |                             |                             | B6/—                        |
| B6×B6                  |                             |                             |                             |                             | B6/B6                       |
| B6×B6                  |                             |                             |                             |                             | PWD/B6                      |
| B6×B6                  |                             |                             |                             |                             | B6+2C3H/B6                  |

TW, mean testicular weight; SC, mean sperm count in paired caput epididymides, OFM, offspring per female per month;

<sup>a</sup>genotype at *Prdm9* (maternal/paternal); —, null; +, added transgenic copies of *Prdm9*; Background: maternal×paternal background. Note that the two fertile classes display overlapping parameters.

doi:10.1371/journal.pgen.1003044.t004

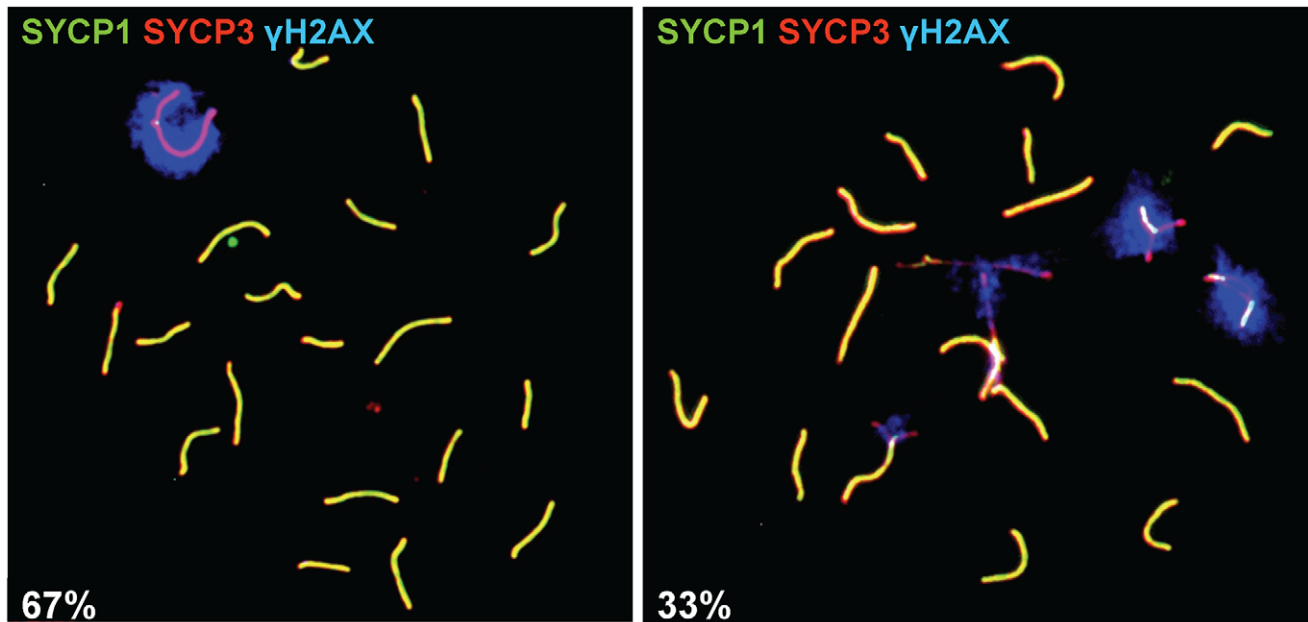

**Figure 2. Sex body formation in the *Prdm9*<sup>PwD/-</sup> F<sub>1</sub> hybrid male.** Surface-spread nuclei of adult testicular cells treated with a hypotonic solution were indirectly labeled using antibodies marking the synaptonemal complex (anti-SYCP1 and anti-SYCP3) to discern the stage of primary spermatocytes and the phosphorylated form of the histone variant H2AX (anti- $\gamma$ H2AX) to visualize the sex body and then observed under a fluorescent microscope. Left, pachytene carrying a sex body (67 cases found per total of 100 nuclei from four biological replicates); right, pachytene without a sex body (33/100 nuclei). doi:10.1371/journal.pgen.1003044.g002

To determine whether the partial arrest of spermatogenesis of the semifertile reciprocal (B6×PwD)F<sub>1</sub> hybrids involves meiosis I, spermatocyte chromosome spreads were analyzed. The relative number of pachytene cells carrying a sex body in the *Prdm9*<sup>B6/PwD</sup> hybrid was lower than in B6 and PwD (Table 3 and Table S4) and it was elevated by removing the *Prdm9*<sup>B6</sup> allele from the *Prdm9*<sup>B6/PwD</sup> hybrid ( $p = 0.03$ , Table 3 and Table S4). The number was higher in the *Prdm9*<sup>C3H/PwD</sup> intersubspecific male in comparison to the *Prdm9*<sup>B6/PwD</sup> F<sub>1</sub> hybrid ( $p = 0.03$ , Table S4), and increased in the BAC5-carrying reciprocal hybrid compared to the same hybrid harboring BAC21 ( $p = 0.003$ , Table S5). Analysis of MLH1 recombination nodules indicated that *Prdm9*<sup>B6/PwD</sup> hybrid testes carried less pachytene spermatocytes with completed recombination than B6 or PwD (Table S4). The relative number of the four stages of primary spermatocytes in *Prdm9*<sup>B6/PwD</sup> differed from that in fertile males (Table S4, Figure S1). The number of offspring (OFM) correlated with meiotic phenotypes in all investigated hybrids (Table S4), thus postmeiotic incompatibilities may play a minor role in our model of F<sub>1</sub> mouse hybrid sterility.

#### Hybrid incompatibility(ies) of *Prdm9*<sup>B6</sup> is not due to a change in *Prdm9* transcript levels

The fertility of the azoospermic *Prdm9*<sup>PwD/B6</sup> F<sub>1</sub> hybrids can be rescued by *Prdm9* overexpression [6]; however, the amounts of the *Prdm9* mRNAs are similar in prepubertal *Prdm9*<sup>PwD/B6</sup> and *Prdm9*<sup>PwD/C3H</sup> hybrids that differ in prospective fertility but not in *Prdm9* dosage [6]. To understand the mechanism of the partial fertility rescue inflicted by the *Prdm9* null alleles in PwD hybrids, the transcript levels of *Prdm9* were investigated in prepubertal hybrid testes. The expression of *Prdm9* was analyzed using five qRT-PCR amplicons along the gene to account for all alternative transcripts [6]. The mRNA levels of *Prdm9* were similar in four investigated types of 14-day-old F<sub>1</sub> hybrid testes carrying *Prdm9*<sup>PwD/B6</sup>, *Prdm9*<sup>PwD/C3H</sup>, *Prdm9*<sup>B6/PwD</sup>, and *Prdm9*<sup>C3H/PwD</sup>,

but were significantly decreased to  $52.9 \pm 2.3\%$  in the prospectively sperm-carrying *Prdm9*<sup>PwD/-</sup> F<sub>1</sub> hybrids compared to the prospectively azoospermic *Prdm9*<sup>PwD/B6</sup> littermate controls (Figure 3). In other words, the transcription from the PwD, C3H, and B6 alleles seems to be similar and dosage-dependent. Therefore, the dominant-negative interaction(s) of the *Prdm9*<sup>B6</sup> allele contributing to sterility in the (PwD×B6)F<sub>1</sub> hybrid is most likely not a consequence of a change in the *Prdm9* transcript level.

#### Discussion

Our “digital genetics” approach (additions and subtractions of *Prdm9* copies) brings a new insight into the interactions of *Prdm9* and other hybrid sterility genes participating in the genetic Dobzhansky-Muller incompatibilities (DMIs) and controlling the reproductive fitness of intersubspecific mouse hybrids.

The phenotype of intersubspecific hybrid males is affected by *Prdm9* allelic combination and dosage (summarized in Table 4). One copy of *Prdm9*<sup>B6</sup> on multiple F<sub>1</sub> intersubspecific hybrid backgrounds is one of the causes of reduced fertility, but a rescue can be achieved with a transgene carrying multiple copies of *Prdm9*<sup>B6</sup> or *Prdm9*<sup>C3H</sup>. The replacement of *Prdm9*<sup>B6</sup> with *Prdm9*<sup>C3H</sup> in (PwD×B6)F<sub>1</sub> males significantly improves fecundity, but it nevertheless leads to semifertility that can be improved by an increased *Prdm9* dosage. The fertility rescue of hybrids by *Prdm9* transgenes is also dependent on the *Prdm9* copy number.

The F<sub>1</sub> background is sensitive to *Prdm9* dosage, indicating DMIs between PwD and B6 genomes. These DMIs could involve genetic interactions between *Prdm9* and other loci, but they might also be explained by interactions between *Prdm9*-independent loci appearing as the consequence of sensitization by the *Prdm9* dosage. Although the overexpression of both *Prdm9*<sup>B6</sup> and *Prdm9*<sup>C3H</sup> alleles improved the fertility of F<sub>1</sub> hybrids, the variation of effects among the *Prdm9* alleles when in one or two copies suggests either

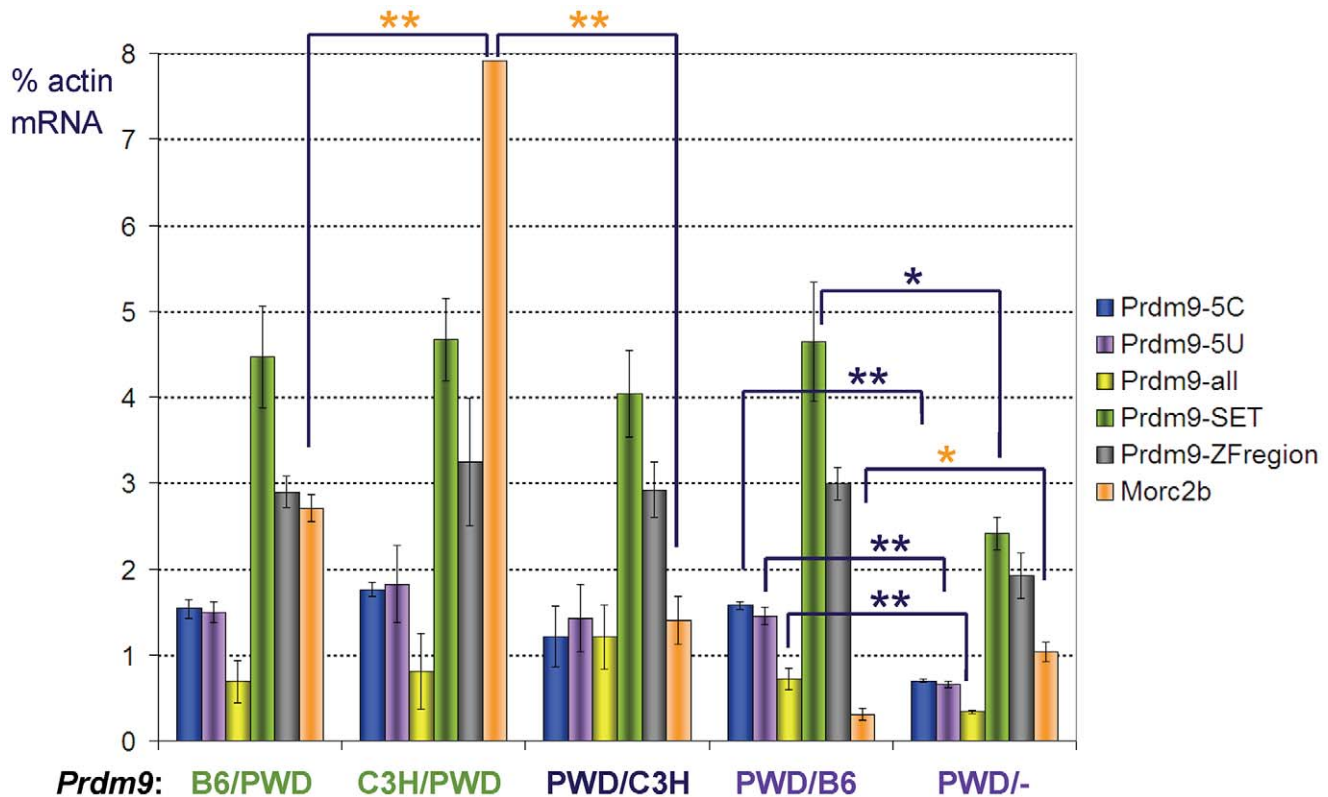

**Figure 3. Expression of *Prdm9* and *Morc2b* in prepubertal hybrid testis.** Real-time qRT-PCR was performed using RNAs of 14-day-old F<sub>1</sub> intersubspecific hybrids of the indicated *Prdm9* genotypes (maternal/paternal); -, null. The animals carrying genotypes labeled by the same color were littermates. The columns indicate mRNA expression (mean  $\pm$  standard deviation) relative to  $\beta$ -actin mRNA for five amplicons in *Prdm9* (arranged from the 5' to 3' of the gene) and one in *Morc2b* (orange); the asterisks mark significantly different values (\*,  $p < 0.05$ ; \*\*,  $p < 0.01$ ); the expression of *Prdm9* was similar in all except the *Prdm9*<sup>PWD/-</sup> F<sub>1</sub> hybrids.  
doi:10.1371/journal.pgen.1003044.g003

variation in the strength of the same interaction(s) or specific DMIs for each *Prdm9* allele. *Prdm9*<sup>B6</sup> was the only allele that resulted in a worse phenotype when one copy was added to either type of F<sub>1</sub> reciprocal hybrids carrying one *Prdm9*<sup>PWD</sup> allele, indicating a dominant-negative effect of *Prdm9*<sup>B6</sup> specific for (PWD $\times$ B6)<sub>F1</sub> and (B6 $\times$ PWD)<sub>F1</sub>. The beneficial effect of the increased copy number of *Prdm9* transgenes irrespective of the transgenic allele suggests that the “toxic” effect of the *Prdm9*<sup>B6</sup> incompatibility can be diluted by the overabundance of *Prdm9*<sup>B6</sup>.

The fertility of F<sub>1</sub> hybrid males harboring chrX<sup>B6</sup> was always better than that of the comparable reciprocal chrX<sup>PWD</sup>-carrying males, suggesting a chrX<sup>PWD</sup> DMI(s) occur(s) in intersubspecific hybrids. Although theoretical options also include the interactions of chrY, mitochondrial genome or genomic imprinting, the interaction of chrX<sup>PWD</sup> and chr17<sup>PWD/B6</sup> was revealed by mapping hybrid sterility loci in ((PWD $\times$ B6) $\times$ B6) backcross, as well as in F<sub>1</sub> using chrX subconsomics [12]. The decreased fertility of the reciprocal hybrid males *Prdm9*<sup>B6/PWD</sup> compared to *Prdm9*<sup>-/PWD</sup> and *Prdm9*<sup>C3H/PWD</sup> could be explained by the incompatibility of *Prdm9*<sup>B6</sup>-*Hstw*<sup>s</sup> with chrX<sup>B6</sup> or autosomal loci.

Another DMI(s) not involving *Prdm9*<sup>B6</sup> probably also acts in F<sub>1</sub> hybrids, since the null *Prdm9* alleles do not restore complete fertility. As the fertility of the reciprocal *Prdm9*<sup>-/PWD</sup> hybrids was superior to that of the *Prdm9*<sup>PWD/-</sup> F<sub>1</sub> males, this DMI (or one of these DMIs) independent of *Prdm9*<sup>B6</sup> could involve chrX<sup>PWD</sup>. Both the elimination of *Prdm9*<sup>B6</sup> and *Prdm9* overexpression rescued fecundity in the reciprocal (B6 $\times$ PWD)<sub>F1</sub> hybrids, suggesting that *Prdm9*<sup>B6</sup> also participate(s) in a DMI(s) not involving chrX<sup>PWD</sup>.

Supposing the same DMIs also work in the (PWD $\times$ B6)<sub>F1</sub> male, a hypothesis supported by its complete sterility, there seems to be at least three sets of incompatibilities affecting the meiotic arrest in this male: *Prdm9*<sup>B6</sup> with chrX<sup>PWD</sup>, *Prdm9*<sup>B6</sup> with an unknown autosomal locus or loci, and chrX<sup>PWD</sup> with an unknown autosomal locus or loci. Alternatively, the sets of incompatibilities could be: interautosomal B6 versus PWD sensitive to the dosage of any *Prdm9* allele; chrX<sup>PWD</sup> with B6 autosomes; *Prdm9*<sup>B6</sup> with *Prdm9*<sup>PWD</sup> and/or with PWD autosomal loci. Although backcrosses using the *Prdm9* null alleles could reveal the number and map positions of the unknown autosomal loci, we already have a good candidate for one of these loci, *Hstw*<sup>s</sup> on chr17<sup>PWD</sup>.

The *Hst1*<sup>s</sup>-*Hstw*<sup>s</sup> (*Prdm9*<sup>B6</sup>-chr17<sup>PWD</sup>) incompatibility in F<sub>1</sub> hybrids is alleviated by deletion of *Prdm9*<sup>B6</sup> and substitution of chr17<sup>B6</sup> with chr17<sup>PWD</sup> leading to increased fertility. An epistatic interaction of chr17<sup>PWD/B6</sup> with chrX<sup>PWD</sup> is necessary, albeit not sufficient for sterility of ((PWD $\times$ B6) $\times$ B6)BC<sub>1</sub> males [12]. However, at the moment we cannot distinguish between the effects of intergenic and interallelic interactions, also because the impact of *Prdm9*<sup>PWD</sup> on hybrid sterility has not been directly investigated. While there is strong evidence that *Prdm9* is identical with *Hst1* in Mmd [6], we are unable to exclude that the *Hstw* locus in Mmm is linked to but different from *Prdm9*. On the other hand, *Prdm9* carries the fastest evolving ZnF domain in metazoans [26] and *Prdm9*<sup>PWD/-</sup> hybrids display a reduced number of pachytene spermatocytes harboring sex bodies, as well as other features of partial meiotic arrest. Therefore, the incompleteness of the rescue of hybrid fertility by *Prdm9*<sup>B6</sup> deletions in the (PWD $\times$ B6)<sub>F1</sub> hybrid

can be interpreted as the consequence of *Prdm9*<sup>PWD</sup> haploinsufficiency in the context of the F<sub>1</sub> hybrid background, because *Prdm9*<sup>PWD/-</sup> F<sub>1</sub> males were more affected than *Prdm9*<sup>PWD/-</sup> backcross males.

The hybrid sterility phenotype shows the features of spermatogenesis seen in the *Prdm9*<sup>-/-</sup> male and it can be alleviated by *Prdm9* transgenes [6]. *Prdm9*<sup>B6</sup> thus appears to participate in a loss-of-function DMI [32]. However, hybrid sterility can also be partially corrected by *Prdm9* null alleles, suggesting a gain-of-function DMI. Thus *Prdm9*<sup>B6</sup> might take part in multiple DMIs, both gain- and loss-of-function. Alternatively, the increased dosage of *Prdm9* could leave its part not participating in a gain-of-function DMI(s) for the normal function.

The viability of certain *Drosophila* hybrids is affected by the gene dosage of *Hmr* (*Hybrid male rescue*) [33] and by the DNA-regulatory divergence of the *Lhr* (*Lethal hybrid rescue*) gene [34]. Although the fertility of mouse hybrids can be rescued by the increased dosage of *Prdm9*, we excluded that the key difference between the *Prdm9*<sup>C3H</sup> and *Prdm9*<sup>B6</sup> alleles lies in increased transcription, because the expression of *Prdm9* mRNAs in *Prdm9*<sup>PWD/B6</sup>, *Prdm9*<sup>PWD/C3H</sup>, *Prdm9*<sup>B6/PWD</sup>, and *Prdm9*<sup>C3H/PWD</sup> prepubertal hybrid testes of the same age were similar despite the different prospective fertility (Figure 3). Increased translational efficiency remains a possibility for the key allelic difference, as *Prdm9*<sup>C3H</sup> and *Prdm9*<sup>B6</sup> differ in the 5'-untranslated region [6]. However, the polymorphism in the ZnF region of the protein products could also provide an explanation for the functional allelic difference.

As hybrid sterility can be overcome by the increased dosage of any *Prdm9* allele, one must control the number of copies in experiments designed to discern the functional sequence differences in the *Hst1* alleles. Grey et al [24] successfully used transgenesis to learn that the distribution of meiotic recombination hotspots is affected by the ZnF domain allele of *Prdm9*; no difference in the distribution was seen in the control *Prdm9*<sup>B6</sup> BAC transgenics. It might seem that the correction of hybrid sterility caused by the same *Prdm9*<sup>B6</sup> BAC could be caused by a different mechanism than redistribution of recombination hotspots. However, the increased dosage of *Prdm9* in F<sub>1</sub> hybrids may overcome the DMIs and change the localization of hotspots. Nevertheless, it is unknown how a changed distribution of hotspots could lead to sterility, especially when considering that *Prdm9* function is dispensable for fertility in the dog [35,36]. Thus (an)other function(s) of *Prdm9* may be involved in hybrid sterility, e.g., transactivation of meiotic genes.

While azoospermia was rare or absent, fertility reduced below the range found in pure species was found in one third of males in the Bavarian part of the natural house mouse hybrid zone [37]. The lack of azoospermic males can be explained by the absence of F<sub>1</sub>-like animals in the zone [37,38]. F<sub>1</sub> male sterility may thus be more important for establishing than for maintaining the hybrid zone. Although most of the fertility differences detected in our study were robust enough to affect the number of offspring, they are likely to have even greater impact in nature considering the sperm competition during multiple mating [39].

*Prdm9*<sup>B6</sup> plays a role in the complete meiotic arrest of (PWD×B6)F<sub>1</sub> hybrids [6]. The importance of this finding for mouse speciation could be somewhat limited considering that only males carrying a certain allele resulting from one direction of a cross between two subspecies are affected. In this report, we demonstrated that *Prdm9* also participates in the sterility of the reciprocal (B6×STUS)F<sub>1</sub> and in the partial meiotic failure of the (B6×PWD)F<sub>1</sub> males. The meiosis of (PWD×B6-*Prdm9*<sup>C3H</sup>)F<sub>1</sub> hybrids harboring another Mmd *Prdm9* allele is adversely affected by a DMI that can be alleviated by an increased *Prdm9* dosage or

using the reciprocal cross, (B6-*Prdm9*<sup>C3H</sup>×PWD)F<sub>1</sub>. The reciprocal crosses of PWD and of the wild-Mmd-derived strain WSB/Ei also display differences in hybrid sterility [40]. Although many quantitative trait loci were detected in (WSB×PWD)F<sub>2</sub> intercross males, heterozygosity in a region overlapping the genomic position of *Prdm9* decreases SC and relative TW; regions associated with fertility were also found on chrX<sup>PWD</sup> [40]. The *Prdm9* allele of WSB is similar to C3H, being the same in the ZnF domain [23], yet WSB differs from C3H in other parts of *Prdm9* [19,41]. Therefore, the semisterility of (PWD×WSB)F<sub>1</sub> males seems to involve *Prdm9*. Admittedly, the degree of importance of *Prdm9* for mouse speciation also depends on the frequency of alleles causing reduced fertility near the hybrid zone that is currently unknown; however, the relevance of *Prdm9* for hybrid sterility now appears to be greater than shown previously.

## Materials and Methods

### Ethics statement

The mice were kept at the Specific Pathogen-Free Facility of the Institute of Molecular Genetics, Prague, and in a conventional breeding facility of the Institute of Vertebrate Biology in Studenec. Principles of laboratory animal care obeyed the Czech Republic Act for Experimental Work with Animals (Decree No. 207/2004 Sb, and the Acts Nos. 246/92 Sb, and 77/2004 Sb) fully compatible with the corresponding EU regulations and standards, namely Council Directive 806/609/EEC and Appendix A of the Council of Europe Convention ETS123.

### Mice

The STUS and PWD/Ph strains are derived from wild mice of Mmm subspecies [30,42]. Mice carrying a deletion of chr17, *Sod2*<sup>d14J</sup>, were generated through embryonic stem cells [28] harboring *Prdm9*<sup>B6</sup> on (129×B6)F<sub>1</sub> background and were transfected with BAC5. The deletion causes lethality when homozygous, it is several Mbp in length, and it includes the *Hst1* region [6]. The BAC5, BAC21, and BAC24 C3H/HeJ transgenes have no effect on fertility in non-intersubspecific hybrid males, but BAC5 and BAC24 rescue fertility of sterile hybrids [6]. The results of quantitative PCR [6] indicate that BAC24 line contains six and BAC5 two copies of *Prdm9*<sup>C3H</sup>, BAC21 carries two copies of truncated *Prdm9* (only the last, ZnF-encoding exon). BAC5 and BAC24 transgenes rescue fertility in *Prdm9*<sup>-/-</sup> (data not shown). All three transgenic lines were transferred to B6 background through 10 generations of backcrossing. The B6-*Prdm9*<sup>C3H</sup> (B6\*B10.C3H-*Hst1*) congenic carries the C3H polymorphisms at *Prdm9* and the differential segment is 3.3 Mbp (position in the mm9 genome assembly 12.5 to 15.9 Mbp) to 6.4 Mbp (10.2 to 16.5 Mbp) in length. The knock-out line *Prdm9*<sup>tm11mat</sup> was generated in 129P2/OlaHsd ES cells by replacement of the first five coding exons with LacZ [20] and maintained on mixed 129P2/OlaHsd \* C57BL/6 background. The C57BL/6J-Tg(RP23-159N6)75Bdm strain (transgene Accession ID: MGI:5311012) was generated by injection of a circular BAC DNA into zygotic male pronuclei; it carries four to five copies of RP23-159N6 BAC harboring *Prdm9*<sup>B6</sup> (*Hst1*) on B6 background, and the *Prdm9* steady-state mRNA level in primary spermatocytes is about 1.3- to 2.5-times increased compared to non-transgenic animals [24], suggesting that two *Prdm9* copies are expressed from the transgene.

### Genotyping, phenotyping, and statistics

See Text S1 for the PCR primers and conditions used for genotyping. Body weight (BW) and testicular weight (TW, from



paired testicles) were determined in adult males (9 to 12-week-old). Sperm count (SC) was obtained from paired caput epididymides at room temperature [6], except for the experiments using the *Prdm9<sup>B6</sup>* transgene, where the entire left epididymis was extracted at 37°C [43]. Multiple biological replicates of each genotype were also analyzed for cellular phenotypes and RNA expression. Slides with surface-spread nuclei (chromosome spreads) were obtained from adult testicular cells using isotonic [44] or hypotonic [45] treatment; see Text S1 for the antibodies. Semiquantitative real-time RT-PCR was performed using total testicular RNAs of 14-day-old F1 interspecific hybrids exactly as described previously [6]. The significance of BW, TW, and qRT-PCR values was analyzed using Welsch's t-test, SC and OFM with Wilcoxon rank sum test, and cellular phenotypes with  $\chi^2$  test. Unless stated otherwise, the comparison significant for TW was also significant for relative TW (TW/BW).

## Supporting Information

**Figure S1** The proportions of four stages of primary spermatocytes determined by SYCP3-SYCP1- $\gamma$ H2AX staining of spread nuclei of adult testicular cells.  $-/-$ , *Prdm9<sup>-/-</sup>* on B6 background; PWD/B6, (PWD $\times$ B6)F<sub>1</sub>; PWD/ $-$ , hemizygous (PWD $\times$ B6-*Prdm9<sup>B6/-</sup>*)F<sub>1</sub>; B6/PWD, (B6 $\times$ PWD)F<sub>1</sub>; PWD/C3H, (PWD $\times$ B6-*Prdm9<sup>C3H</sup>*)F<sub>1</sub>; Fert, fertile males (pooled data from B6, B6-*Prdm9<sup>B6/-</sup>*, and (BAC5 $\times$ PWD)F<sub>1</sub>). Diplo, diplotene; Pach, pachytene; Zygo, zygotene; Lept, leptotene spermatocytes. The number above each column designates the total number of counted cells (average of 3.6 males per column); the asterisks indicate significant differences ( $\chi^2$  test): \*,  $p < 0.05$ ; \*\*,  $p < 0.01$ ; \*\*\*,  $p < 0.001$ . (TIF)

## References

- Haldane JBS (1922) Sex ratio and unisexual sterility in animal hybrids. *J Genetics* 12: 101–109.
- Orr HA, Masly JP, Presgraves DC (2004) Speciation genes. *Curr Opin Genet Dev* 14: 675–679.
- Ting CT, Tsauro SC, Wu ML, Wu CI (1998) A rapidly evolving homeobox at the site of a hybrid sterility gene. *Science* 282: 1501–1504.
- Sun S, Ting CT, Wu CI (2004) The normal function of a speciation gene, *Odyseus*, and its hybrid sterility effect. *Science* 305: 81–83.
- Masly JP, Jones CD, Noor MA, Locke J, Orr HA (2006) Gene transposition as a cause of hybrid sterility in *Drosophila*. *Science* 313: 1448–1450.
- Mihola O, Trachtulec Z, Vleck C, Schimenti JC, Forejt J (2009) A mouse speciation gene encodes a meiotic histone H3 methyltransferase. *Science* 323: 373–375.
- Phadnis N, Orr HA (2009) A single gene causes both male sterility and segregation distortion in *Drosophila* hybrids. *Science* 323: 376–379.
- Bayes JJ, Malik HS (2009) Altered heterochromatin binding by a hybrid sterility protein in *Drosophila* sibling species. *Science* 326: 1538–1541.
- Sawamura K, Machara K, Mashino S, Kagesawa T, Kajiwara M, et al. (2010) Introgression of *Drosophila simulans* nuclear pore protein 160 in *Drosophila melanogaster* alone does not cause inviability but does cause female sterility. *Genetics* 186: 669–676.
- Dobzhansky T (1951) Experiments on sexual isolation in *Drosophila*: X. Reproductive isolation between *Drosophila pseudoobscura* and *Drosophila persimilis* under natural and under laboratory conditions. *Proc Natl Acad Sci U S A* 37: 792–796.
- Forejt J, Ivanyi P (1974) Genetic studies on male sterility of hybrids between laboratory and wild mice (*Mus musculus L.*). *Genet Res* 24: 189–206.
- Dzur-Gejdosova M, Simecek P, Gregorova S, Bhattacharyya T, Forejt J (2012) Dissecting the genetic architecture of F1 hybrid sterility in house mice. *Evolution*, in press. doi:10.1111/j.1558-5646.2012.01684.x
- Forejt J (1996) Hybrid sterility in the mouse. *Trends Genet* 12: 412–417.
- Forejt J, Vincek V, Klein J, Lehrach H, Loudova-Mickova M (1991) Genetic mapping of the *t*-complex region on mouse chromosome 17 including the *Hybrid sterility-1* gene. *Mamm Genome* 1: 84–91.
- Trachtulec Z, Vincek V, Hamvas RM, Forejt J, Lehrach H, et al. (1994) Physical map of mouse chromosome 17 in the region relevant for positional cloning of the *Hybrid sterility 1* gene. *Genomics* 23: 132–137.
- Gregorova S, Mnuokova-Fajdelova M, Trachtulec Z, Capkova J, Loudova M, et al. (1996) Sub-milliMorgan map of the proximal part of mouse Chromosome 17 including the *hybrid sterility 1* gene. *Mamm Genome* 7: 107–113.
- Trachtulec Z, Mihola O, Vleck C, Himmelbauer H, Paces V, et al. (2005) Positional cloning of the *Hybrid sterility 1* gene: fine genetic mapping and evaluation of two candidate genes. *Biol J Linn Soc* 84: 637–641.
- Mihola O, Forejt J, Trachtulec Z (2007) Conserved alternative and antisense transcripts at the *programmed cell death 2* locus. *BMC Genomics* 8: 20.
- Trachtulec Z, Vleck C, Mihola O, Gregorova S, Fotopulosova V, et al. (2008) Fine haplotype structure of a chromosome 17 region in the laboratory and wild mouse. *Genetics* 178: 1777–1784.
- Hayashi K, Yoshida K, Matsui Y (2005) A histone H3 methyltransferase controls epigenetic events required for meiotic prophase. *Nature* 438: 374–378.
- Buard J, Barthes P, Grey C, de Massy B (2009) Distinct histone modifications define initiation and repair of meiotic recombination in the mouse. *EMBO J* 28: 2616–2624.
- Baudat F, Buard J, Grey C, Fledel-Alon A, Ober C, et al. (2010) PRDM9 is a major determinant of meiotic recombination hotspots in humans and mice. *Science* 327: 836–840.
- Parvanov ED, Petkov PM, Paigen K (2010) *Prdm9* controls activation of mammalian recombination hotspots. *Science* 327: 835.
- Grey C, Barthes P, Chauveau-Le Fric G, Langa F, Baudat F, et al. (2011) Mouse PRDM9 DNA-binding specificity determines sites of histone H3 lysine 4 trimethylation for initiation of meiotic recombination. *PLoS Biol* 9: e1001176. doi:10.1371/journal.pbio.1001176
- Forejt J, Pialek J, Trachtulec Z (2012) Hybrid male sterility genes in the mouse subspecific crosses. In: Macholan M, Baird SJE, Muclinger P and Pialek J, editors. *Evolution of the House Mouse*. Cambridge: Cambridge University Press, pp. 482–503.
- Oliver PL, Goodstadt L, Bayes JJ, Birtle Z, Roach KC, et al. (2009) Accelerated evolution of the *Prdm9* speciation gene across diverse metazoan taxa. *PLoS Genet* 5: e1000753. doi:10.1371/journal.pgen.1000753
- Gregorova S, Divina P, Storchova R, Trachtulec Z, Fotopulosova V, et al. (2008) Mouse consomic strains: exploiting genetic divergence between *Mus m. musculus* and *Mus m. domesticus* subspecies. *Genome Res* 18: 509–515.
- Bergstrom DE, Bergstrom RA, Munroe RJ, Lee BK, Browning VL, et al. (2003) Overlapping deletions spanning the proximal two-thirds of the mouse *t* complex. *Mamm Genome* 14: 817–829.
- Browning VL, Bergstrom RA, Daigle S, Schimenti JC (2002) A haplolethal locus uncovered by deletions in the mouse *T* complex. *Genetics* 160: 675–682.

**Table S1** The effect of *Prdm9* dosage on hybrids of the STUS strain. (DOC)

**Table S2** The fertility of males hemizygous for the *Prdm9<sup>gm11mat</sup>* knock-out. (DOC)

**Table S3** The effect of the *Sod2<sup>dfl47</sup>* deletion and *Prdm9<sup>gm11mat</sup>* knock-out (KO) on hybrid sterility. (DOC)

**Table S4** Details of reproductive phenotypes of various males. (DOC)

**Table S5** Details of reproductive phenotypes. (DOC)

**Text S1** Supporting Materials and Methods. Antibodies, primers, PCR conditions. (DOC)

## Acknowledgments

We thank K. Stein, E. Škaloudová, and J. Perlová for technical assistance; M. Lišáková for mouse keeping; and P. Jansa, D. Homolka, and T. Bhattacharyya for helpful discussions. We are also grateful to P. Petkov and three anonymous reviewers for useful comments and to Š. Takáčová for editing English.

## Author Contributions

Conceived and designed the experiments: ZT. Performed the experiments: PF ZT OM JP. Analyzed the data: ZT PŠ. Contributed reagents/materials/analysis tools: JCS YM FB BdM JF SG. Wrote the paper: ZT JF BdM FB JCS. Interpreted the data analyses: ZT JF BdM FB JCS JP. Commented and approved the manuscript: PF OM PŠ SG YM JP.

30. Pialek J, Vyskocilova M, Bimova B, Havelkova D, Pialkova J, et al. (2008) Development of unique house mouse resources suitable for evolutionary studies of speciation. *J Hered* 99: 34–44.
31. Vyskocilova M, Prazanova G, Pialek J (2009) Polymorphism in hybrid male sterility in wild-derived *Mus musculus musculus* strains on proximal chromosome 17. *Mamm Genome* 20: 83–91.
32. Maheshwari S, Barbash DA (2011) The genetics of hybrid incompatibilities. *Annu Rev Genet* 45: 331–355.
33. Barbash DA, Roote J, Ashburner M (2000) The *Drosophila melanogaster* Hybrid male rescue gene causes inviability in male and female species hybrids. *Genetics* 154: 1747–1771.
34. Maheshwari S, Barbash DA (2012) Cis-by-Trans regulatory divergence causes the asymmetric lethal effects of an ancestral hybrid incompatibility gene. *PLoS Genet* 8: e1002597. doi:10.1371/journal.pgen.1002597
35. Munoz-Fuentes V, Di Rienzo A, Vila C (2011) *Prdm9*, a major determinant of meiotic recombination hotspots, is not functional in dogs and their wild relatives, wolves and coyotes. *PLoS ONE* 6: e25498. doi:10.1371/journal.pone.0025498
36. Axelsson E, Webster MT, Ratnakumar A, Ponting CP, Lindblad-Toh K (2012) Death of PRDM9 coincides with stabilization of the recombination landscape in the dog genome. *Genome Res* 22: 51–63.
37. Turner LM, Schwahn DJ, Harr B (2011) Reduced male fertility is common but highly variable in form and severity in a natural house mouse hybrid zone. *Evolution* 66: 443–458.
38. Macholan M, Munclinger P, Sugerikova M, Dufkova P, Bimova B, et al. 2007. Genetic analysis of autosomal and X-linked markers across a mouse hybrid zone. *Evolution* 61: 746–771.
39. Dean MD, Ardlic KG, Nachman MW (2006) The frequency of multiple paternity suggests that sperm competition is common in house mice (*Mus domesticus*). *Mol Ecol* 15: 4141–4151.
40. White MA, Steffy B, Wiltshire T, Payseur BA Genetic dissection of a key reproductive barrier between nascent species of house mice. *Genetics* 189: 289–304.
41. Keane TM, Goodstadt L, Danecek P, White MA, Wong K, et al. (2011) Mouse genomic variation and its effect on phenotypes and gene regulation. *Nature* 477: 289–294.
42. Gregorova S, Forejt J (2000) PWD/Ph and PWK/Ph inbred mouse strains of *Mus m. musculus* subspecies—a valuable resource of phenotypic variations and genomic polymorphisms. *Folia Biol (Praha)* 46: 31–41.
43. Vyskocilova M, Trachtulec Z, Forejt J, Pialek J (2005) Does geography matter in hybrid sterility in house mice? *Biol J Linn Soc* 84: 663–674.
44. Turner JM, Mahadevaiah SK, Fernandez-Capetillo O, Nussenzweig A, Xu X, et al. (2005) Silencing of unsynapsed meiotic chromosomes in the mouse. *Nat Genet* 37: 41–47.
45. Anderson LK, Reeves A, Webb LM, Ashley T (1999) Distribution of crossing over on mouse synaptonemal complexes using immunofluorescent localization of MLH1 protein. *Genetics* 151: 1569–1579.
